# Supplementary material
Source: PubMed Central journal article supplement (PMC6531330)
Supplement: NIHMS1526522-supplement-Major_Resource_Table.pdf [file NIHMS1526522-supplement-Major_Resource_Table.pdf]

## Major Resources Tables

**Animals (in vivo studies): Not applicable**

| Species | Vendor or Source | Background Strain | Sex |
|---------|------------------|-------------------|-----|
|         |                  |                   |     |
|         |                  |                   |     |
|         |                  |                   |     |

**Animal breeding: Not applicable**

|                        | Species | Vendor or Source | Background Strain | Other Information |
|------------------------|---------|------------------|-------------------|-------------------|
| <b>Parent - Male</b>   |         |                  |                   |                   |
| <b>Parent - Female</b> |         |                  |                   |                   |

**Antibodies:** all provided as a component of the immunoassay kits

| Target antigen | Vendor or Source                                                    | Catalog #                                                                                          | Working concentration                     | Lot #<br>(preferred but not required)                                              |
|----------------|---------------------------------------------------------------------|----------------------------------------------------------------------------------------------------|-------------------------------------------|------------------------------------------------------------------------------------|
| MDA Adducts    | Cell Biolabs, Inc.                                                  | ELISA Kit: STA-832<br>Part No: 283201                                                              | Not provided; shipped as a 1000X solution | 613015, 613017, 613018, 613024, 613025                                             |
| Melatonin      | Bühlmann, utilizing the Kennaway G280 anti-melatonin antibody       | RIA Kit: RK-DSM2-U<br>Part No: B-DSM-AS                                                            | Not provided: working strength            | Antibody lot #: 2533, 3432, 0730, 0727                                             |
| Endothelin-1   | R & D Systems, Inc., Sandwich assay, Both antibodies are monoclonal | ELISA Kit: DET100, SET100<br>Part No: ET-1 conjugate: 893912<br>Antibody coated microplate: 893911 | Not Provided; working strength            | Antibody coated Microplate: P164674<br>Conjugate: 326502, 337393, P127083, P165946 |

**Cultured Cells: Not applicable**

| Name | Vendor or Source | Sex (F, M, or unknown) |
|------|------------------|------------------------|
|      |                  |                        |
|      |                  |                        |
|      |                  |                        |
