# Supplementary material
Source: PubMed Central journal article supplement (PMC6531330)
Supplement: NIHMS1526522-supplement-Supplemental_Material.pdf [file NIHMS1526522-supplement-Supplemental_Material.pdf]

Supplementary material

Supplementary Table I: Individual participant information, segregated by females and males

| Females                               | S01  | S02  | S03* | S04  | S05  | S06  | S07  | S08* | S09  | S10* | S11* |
|---------------------------------------|------|------|------|------|------|------|------|------|------|------|------|
| Age (years)                           | 44   | 50   | 55   | 46   | 56   | 46   | 43   | 53   | 46   | 64   | 48   |
| Body mass index (kg·m <sup>-2</sup> ) | 32.3 | 24.0 | 26.3 | 39.9 | 33.0 | 30.7 | 23.6 | 25.9 | 23.1 | 30.9 | 39.7 |
| Resting Systolic BP (mmHg)            | 112  | 106  | 96   | 124  | 140  | 109  | 103  | 114  | 108  | 132  | 126  |
| Resting Diastolic BP (mmHg)           | 69   | 43   | 61   | 59   | 77   | 65   | 63   | 61   | 56   | 77   | 63   |
| Resting HR (bpm)                      | 72   | 60   | 64   | 81   | 56   | 68   | 56   | 60   | 60   | 65   | 68   |
| Fasting BG (mg/dL)                    | 96   | 89   | 98   | 90   | 101  | 97   | 88   | 94   | 83   | 99   | 91   |
| Hemoglobin (g/dL)                     | 14.5 | 12.8 | 13.1 | 12.7 | 13.4 | 13.9 | 13.7 | 12.9 | 13.1 | 13.7 | 14.0 |
| Hematocrit (%)                        | 41.1 | 38.9 | 39.8 | 41.1 | 40.9 | 39.5 | 42   | 39.2 | 37.8 | 41.7 | 42.2 |
| Plasma Sodium (mEq/L)                 | 136  | 138  | 144  | 139  | 138  | 138  | 140  | 142  | 140  | 141  | 137  |
| Plasma Potassium (mEq/L)              | 3.8  | 3.8  | 4.2  | 4.1  | 3.8  | 3.9  | 3.8  | 3.8  | 3.7  | 4.0  | 3.6  |
| Plasma Chloride (mEq/L)               | 106  | 103  | 102  | 105  | 104  | 106  | 106  | 109  | 106  | 108  | 105  |
| Plasma BUN (mg/dL)                    | 11   | 16   | 14   | 16   | 13   | 7    | 7    | 7    | 11   | 11   | 11   |
| Plasma Creatinine (mg/dL)             | 0.75 | 0.62 | 1.0  | 0.99 | 0.77 | 0.54 | 0.6  | 0.8  | 0.65 | 0.81 | 0.57 |
| Plasma Calcium (mg/dL)                | 8.8  | 9.1  | 9.0  | 9.0  | 8.8  | 8.3  | 8.6  | 8.8  | 8.4  | 8.6  | 8.2  |

| Males                                 | <u>S01</u> | <u>S02</u> | S03  | S04  | <u>S05</u> | <u>S06</u> | <u>S07</u> | S08  | <u>S09</u> | <u>S10</u> |
|---------------------------------------|------------|------------|------|------|------------|------------|------------|------|------------|------------|
| Age (years)                           | 53         | 41         | 56   | 54   | 63         | 57         | 52         | 64   | 62         | 48         |
| Body mass index (kg·m <sup>-2</sup> ) | 25.9       | 24.3       | 18.2 | 25.1 | 24.0       | 39.9       | 25.1       | 25.2 | 24.4       | 31.7       |
| Resting Systolic BP (mmHg)            | 114        | 129        | 108  | 140  | 124        | 129        | 127        | 139  | 130        | 131        |
| Resting Diastolic BP (mmHg)           | 54         | 79         | 69   | 70   | 61         | 66         | 75         | 72   | 65         | 87         |
| Resting HR (bpm)                      | 47         | 56         | 47   | 52   | 56         | 69         | 63         | 58   | 57         | 75         |
| Fasting BG (mg/dL)                    | 94         | 96         | 92   | 91   | 91         | 95         | 85         | 100  | 86         | 102        |
| Hemoglobin (g/dL)                     | 14.6       | 15.5       | 13.9 | 16.2 | 14.4       | 15.7       | 15.1       | 14.6 | 13.9       | 15.8       |
| Hematocrit (%)                        | 41.8       | 43.6       | 41.1 | 48.4 | 41.2       | 45.2       | 44.4       | 44.3 | 43.5       | 44.3       |
| Plasma Sodium (mEq/L)                 | 142        | 141        | 141  | 140  | 140        | 136        | 140        | 142  | 141        | 140        |
| Plasma Potassium (mEq/L)              | 4.3        | 3.8        | 4.0  | 4.4  | 4.3        | 3.9        | 3.7        | 4.7  | 4.0        | 3.9        |
| Plasma Chloride (mEq/L)               | 110        | 107        | 109  | 106  | 107        | 103        | 103        | 109  | 106        | 108        |
| Plasma BUN (mg/dL)                    | 23         | 14         | 24   | 15   | 16         | 15         | 10         | 18   | 15         | 12         |
| Plasma Creatinine (mg/dL)             | 0.98       | 0.76       | 0.91 | 0.88 | 0.86       | 1.05       | 1.02       | 0.87 | 0.85       | 0.72       |
| Plasma Calcium (mg/dL)                | 8.5        | 9.6        | 9.2  | 8.6  | 8.4        | 8.5        | 8.5        | 8.8  | 9.0        | 8.8        |

BP: blood pressure, HR: Heart Rate; bpm: Beats per minute; BG: Blood Glucose; BUN: Blood urea nitrogen. \* signifies post-menopausal females. Italics signifies participants will complete L-FMC measurement. Underline signifies participants with complete blood biomarker data.

Supplementary Figure I. Effect of time into protocol on MDA and ET-1

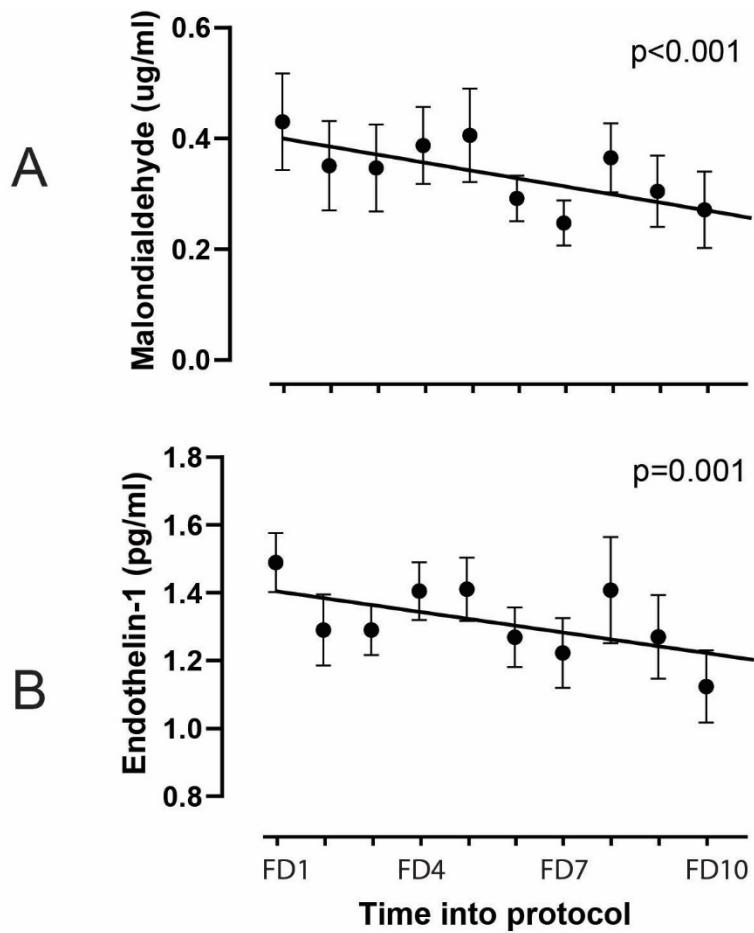

Legend: MDA (Panel A) and ET-1 (Panel B) significantly decline across the 52-h circadian protocol possible as a result of the increased sleep opportunity, and controlled diet in the laboratory compared to free-living conditions. Solid line displays the model. Observed data are plotted as mean  $\pm$  SEM. FD = 'forced desynchrony day'.
